# Supplementary material
Source: publisher site journal article supplement (https://www.spandidos-publications.com/2728/downloadSupplementary)

Figure S1. Plexin A4 overexpression plasmid significantly promotes the expression of plexin A4. Reverse transcription-quantitative PCR was used to evaluate the expression of plexin A4 after transfection. \*\*P<0.01.

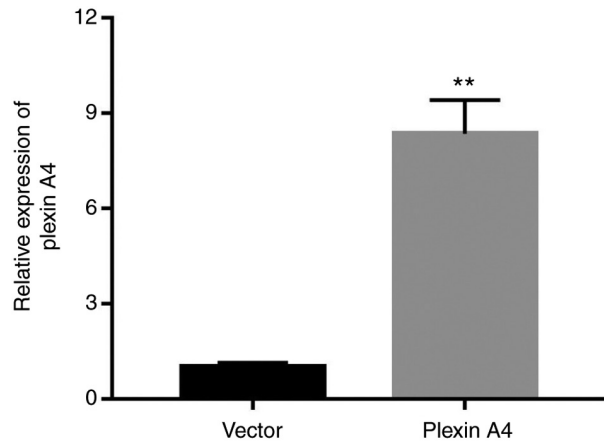

Supplement: Supplementary file 1 [file downloadSupplementary]
